# Supplementary material for: Robotic-assisted thymectomy for early-stage thymoma: a propensity-score matched analysis
Source: Springer Nature journal article supplement (doi:10.1007/s11701-018-0816-3), 2018-04-28
Supplement: MOESM1 [file 15727160]

**Supplementary table 1.** Patients’ characteristics according to type of surgery

|  | All | OT | RoT | P-value |
| --- | --- | --- | --- | --- |
| All | 76 (100) | 48 (100) | 28 (100) |  |
| Sex |  |  |  |  |
| Male | 29 (38.2) | 18 (37.5) | 11 (39.3) |  |
| Female | 47 (61.8) | 30 (62.5) | 17 (60.7) | 1.00 |
| Age |  |  |  |  |
| Mean ± SD Median [range] | 59.1±11.8  59 [33-81] | 58.3±11.9  58 [33-78] | 60.3±11.9  62 [33-81] | 0.34 |
| <60 | 38 (50.0) | 26 (54.2) | 12 (42.9) |  |
| 60-69 | 22 (28.9) | 12 (25.0) | 10 (35.7) |  |
| 70+ | 16 (21.1) | 10 (20.8) | 6 (21.4) | 0.61 |
| MG |  |  |  |  |
| No | 69 (90.8) | 42 (87.5) | 27 (96.4) |  |
| Yes | 7 ( 9.2) | 6 (12.5) | 1 ( 3.6) | 0.25 |
| Pulmonary resection |  |  |  |  |
| No | 72 (94.7) | 45 (93.8) | 27 (96.4) |  |
| Yes | 4 ( 5.3) | 3 ( 6.3) | 1 ( 3.6) | 1.00 |
| Intervention time (min) |  |  |  |  |
| Mean ± SD  Median [range] | 140±55  136.5 [64-332] | 149±51  146 [71-271] | 125±58  100 [64-332] | 0.06 |
| <120 | 31 (40.8) | 14 (29.2) | 17 (60.7) |  |
| ≥120 | 45 (59.2) | 34 (70.8) | 11 (39.3) | **0.009** |
| Size |  |  |  |  |
| Mean ± SD  Median [range] | 4.2±1.8  4.5 [0.5-7.0] | 4.6±1.7  5.0 [0.5-7.0] | 3.6±1.7  3.2 [1.0-7.0] | **0.02** |
| <2 cm | 9 (11.8) | 5 (10.4) | 4 (14.3) |  |
| 2-3 cm | 9 (11.8) | 3 ( 6.3) | 6 (21.4) |  |
| 3-4 cm | 13 (17.1) | 6 (12.5) | 7 (25.0) |  |
| 4-5 cm | 12 (15.8) | 9 (18.8) | 3 (10.7) |  |
| >5 cm | 33 (43.4) | 25 (52.1) | 8 (28.6) | **0.03** |
| WHO |  |  |  |  |
| A | 7 ( 9.2) | 4 ( 8.3) | 3 (10.7) |  |
| AB | 19 (25.0) | 15 (31.3) | 4 (14.3) |  |
| B1 | 13 (17.1) | 9 (18.8) | 4 (14.3) |  |
| B2 | 19 (25.0) | 11 (22.9) | 8 (28.6) |  |
| B3 | 13 (17.1) | 7 (14.6) | 6 (21.4) |  |
| C | 5 ( 6.6) | 2 ( 4.2) | 3 (10.7) | 0.51 |
| Stage |  |  |  |  |
| I | 22 (28.9) | 13 (27.1) | 9 (32.1) |  |
| IIA | 21 (27.6) | 10 (20.8) | 11 (39.3) |  |
| IIB | 33 (43.4) | 25 (52.1) | 8 (28.6) | 0.11 |
| Pre-operative treatment |  |  |  |  |
| None | 75 (98.7) | 47 (97.9) | 28 (100) |  |
| Chemotherapy | 1 ( 1.3) | 1 ( 2.1) | 0 ( 0.0) | 1.00 |
| Adjuvant treatment |  |  |  |  |
| None | 48 (63.2) | 25 (52.1) | 23 (82.1) |  |
| Radiotherapy | 28 (36.8) | 23 (47.9) | 5 (17.9) | **0.01** |

OT: open thymectomy; RoT robotic assisted thymectomy; MG: Myasthenia Gravis;

Bold text indicates a statistically significant difference with a p-value less than 0.05.

**Supplementary table 2.** Patients’ outcome according to type of surgery

|  | All | OT | RoT | P-value |
| --- | --- | --- | --- | --- |
| Intensive care unit (days) |  |  |  |  |
| No | 64 (84.2) | 36 (75.0) | 28 (100.0) |  |
| Yes (1-2 days) | 12 (15.8) | 12 (25.0) | 0 | **0.003** |
| Hospitalization (Days) |  |  |  |  |
| Mean ± SD  Median [range] | 5.0±1.9  5 [2-11] | 5.7±1.6  5 [3-10] | 3.9±1.8  3 [2-11] | **<0.0001** |
| 2-4 | 30 (39.5) | 10 (20.8) | 20 (71.4) |  |
| 5 | 23 (30.3) | 17 (35.4) | 6 (21.4) |  |
| ≥6 | 23 (30.3) | 21 (43.8) | 2 ( 7.1) | **<0.0001** |
| Post-operative Complications |  |  |  |  |
| None | 65 (85.5) | 42 (87.5) | 23 (82.1) |  |
| Minor | 10 (13.2) | 6 (12.5) | 4 (14.3) |  |
| Major | 3 ( 3.9) | 2 ( 4.2) | 1§( 3.6) | 1.00 |
| Late complications |  |  |  |  |
| None | 73 (96.1) | 45 (93.8) | 28 (100) |  |
| Any | 3 ( 3.9) | 3 ( 6.3) | 0 | 0.29 |
| Recurrence |  |  |  |  |
| None | 75 (98.7) | 47 (97.9) | 28 (100) |  |
| Any | 1 ( 1.3) | 1 ( 2.1) | 0 | 1.00 |
| Vital status |  |  |  |  |
| Alive | 71 (93.4) | 43 (89.6) | 28 (100) | Log-rank |
| Dead of disease | 1* ( 1.3) | 1 (2.1) | 0 | 0.35 |
| Dead of other cause | 4**( 5.3) | 4 (8.3) | 0 |

OT: open thymectomy; RoT robotic assisted thymectomy; Bold text indicates a statistically significant difference with a p-value less than 0.05.

§ Myasthenic crisis

* Dead of recurrence of metaplastic thymoma

** Dead of ileal neuroendocrine tumor, lung cancer, pancreatic cancer and thoracic wall sarcoma.
